RESEARCH ARTICLE

# Impacts of visual impairment on pragmatic impairment: A systematic review and meta-analysis

Cheng Lulu<sup>1,2</sup>, Hong Xie<sup>1‡\*</sup>, Peng Wang<sup>3</sup>, Ting Zhang<sup>4</sup>

**1** School of Foreign Studies, China University of Petroleum (East China), Qingdao, China, **2** Shanghai Center for Research in English Language Education, Shanghai International Studies University, Shanghai, China, **3** School of International Education, Guizhou Normal University, Guiyang, China, **4** College of Engineering, Beijing University, Beijing, China

‡ HX is worked as co-first author on this work.

\* [laraxie888@gmail.com](mailto:laraxie888@gmail.com)

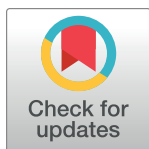

## Abstract

### Background

Consideration for patients with visual impairment, from low vision to blindness, is an important part of building a barrier-free society. Some authors have elaborated that visual impairment can indeed lead to delayed development in theory of mind, thereby causing pragmatic knowledge deficiency. Verifying whether those with eye conditions have pragmatic impairment is an essential way for their clinical evaluation, intervention and rehabilitation.

### Objective

We primarily carry out a meta-analysis of visual impairment from low vision to blindness and pragmatic impairment in people with low vision or blindness to verify visual impairment may cause pragmatic impairment.

### Data sources

Electronic databases Pubmed, Medline, MesH, Psychinfo, Ovid, EBSCO and CNKI and the reference sections of previous reviews.

### Study eligibility criteria

Studies were included when they built on primary data from clinical questionnaire surveys or field trials anywhere in the world, and when they reported impacts of visual impairment on social cognition, communication, skills, behavior and intelligence. In total, 25 original studies were included, in which 25735 people were evaluated.

### Results

Statistically, visual impairments and pragmatic impairment exist correlation due to the significant  $p$  value ( $p = 0.0005 < 0.05$ ) in group and the subgroup sorted in the light of 18 years old

## OPEN ACCESS

**Citation:** Lulu C, Xie H, Wang P, Zhang T (2023) Impacts of visual impairment on pragmatic impairment: A systematic review and meta-analysis. PLoS ONE 18(12): e0294326. <https://doi.org/10.1371/journal.pone.0294326>

**Editor:** Thiago P. Fernandes, Federal University of Paraiba, BRAZIL

**Received:** March 14, 2023

**Accepted:** October 30, 2023

**Published:** December 8, 2023

**Copyright:** © 2023 Lulu et al. This is an open access article distributed under the terms of the [Creative Commons Attribution License](https://creativecommons.org/licenses/by/4.0/), which permits unrestricted use, distribution, and reproduction in any medium, provided the original author and source are credited.

**Data Availability Statement:** All relevant data are within the paper, its [Supporting Information](#) files and the data availability URL.

**Funding:** This research was supported by the following three funded programs: Firstly, Industry-university Cooperative Education Project of Ministry of Education: Research on the Cultivation of Foreign Language Translation Talents in the Backdrop of New Humanities (220601549232039). <http://sfs.upc.edu.cn/2022/0414/c16907a371909/page.htm>. Secondly, China University of Petroleum (East China) Teaching Research and Reform

Project: Research on the Training Mode of Interdisciplinary Talents with "Major + Foreign Language" under the "Double First-class" Initiative (QN2022025). <http://sfs.upc.edu.cn/2022/0414/c16907a371909/page.htm>. Thirdly, Shandong Provincial Higher Education Youth Innovation Team Talent Introduction and Cultivation Project: "Artificial Intelligence and Interpretation" Research Team. <http://sfs.upc.edu.cn/2022/0414/c16907a371909/page.htm>. There was no additional external funding received for this study.

**Competing interests:** The authors have declared that no competing interests exist.

( $p < 0.0001$  and  $p = 0.003 < 0.05$ ). Psychologically, because people with visual impairment can not normally get non-verbal information, they can not get a complete pragmatic knowledge system. Pragmatic knowledge deficiency leads to abnormal in executive functions and development delay from the perspective of theory of mind, inducing pragmatic impairment. Therefore, visual impairment has an impact on pragmatic impairment.

## Conclusion

The meta-analysis reveals robust evidence on the relationship of vision impairment and pragmatic impairment in children or adults. Such evidence may help to gradually improve the clinical evaluation, intervention and rehabilitation of these people.

## Introduction

Recently, with the development of Internet of things, blockchain, artificial intelligence and metaverse, the construction of barrier-free society accelerates [1]. And technology empowers life, further deepening the depth and breadth of the application of digital intelligence technology in interpersonal communication. Meanwhile, according to the Global Report on Traditional and Complementary Medicine launched by the World Health Organization in 2019, pragmatic communication problems of people with visual impairment from low vision to blindness have gained enormous attentions [2]. Particular, such eye conditions result in pragmatic impairment, leading to significant adverse effects in their social communication.

Pragmatic impairment usually refer to "semantic-pragmatic language disorder" or "pragmatic language disorders" or "pragmatic language difficulties" [3–5]. The previous studies on visual impairment and pragmatic impairment mainly focuses on the following two aspects: (a) Language comprehension impairment. Children with congenital visual impairment can trigger delayed psychological development, especially in terms of second theory of mind, awareness of other people's belief, and non-verbal language like irony or rhetoric. In addition, they are unable to understand the intention of verbal communication in a timely and accurate manner [6–9]. (b) Social behavior impairment. James et al. (2007) [10] and Jeremy et al. (2010) [11] clinically found that with the deepening of the degree of visual impairment, children or adults were difficult to express their behavior. And their social function decreased, and social communication difficulties further manifested. Specifically, their reception of social signals such as facial expressions, gestures and body posture, is usually low resolution ratio, and is limited by some environmental factors like push and squeeze or surrounding noise [12–16].

Language comprehension and social communication is a part of pragmatic competence performance [17]. Hence, previous researches verified that individuals with low vision or blindness suffer from mild to severe pragmatic impairment, resulting in incoherent narration and non-cooperative social interaction [18]. The coherent narration and fluent cooperation is the driver of executive functions and development outcome of the mind theory [19–21]. Hence, people with visual impairment have abnormal executive functions and delay the mind theory development [7, 22]. In other words, they can not speculate on their own and others' psychological states like intentions, wishes, beliefs, motivations and emotions by a complete knowledge system, and make relationship prediction and interpretation of others' social behaviors, which includes planning, inhibition, coordination and control of activity sequence, working memory and psychological flexibility [23–25].

Some studies consider that visual impairments have an impact on pragmatic impairment [6–25]. If there are contradictions for the result, a meta-analysis will help to understand the level of evidence between their relationships evaluated, since it seeks to summarize the results found. Nevertheless, rare meta-analysis is conducted to support this conclusion. Thus, we went beyond average impacts at micro level and used meta-regressions by the meta analysis to explain impact heterogeneity and test for possible biases. Our study provides the summary evidences for the assumption, visual impairment in minors and adults may lead to pragmatic impairment on most even all social activities given the significant *p* value.

## Materials and method

We performed this study according to Preferred Reporting Items for Systematic Reviews and Meta-Analysis (PRISMA) guidelines ([S1 Checklist](#)). Subjects in the included articles and participants who triggered the inspiration for our article have given written informed consent to publish these case details. During the whole research, Hong Xie and Peng Wang carry out the data search blindly and separately, while Lulu Cheng monitors and summarizes the included data and their quality. All data were anonymously analyzed, and this study was reviewed and allowed by the Academic Ethics Review Committee in School of Foreign Studies of China University of Petroleum (East China) (IRB) in China.

## Literature search and selection criteria

We searched the electronic databases Pubmed, Medline, Mesh, Psycinfo, Ovid, EBSCO, WOS, Ovid, HMIC, ERIC and CNKI, the reference sections of previous reviews from their earliest entries to December 20, 2022. The exact electronic search strategy and a full description are offered in [S1 File](#).

Studies published in English that meets the following criteria is included: (1) the study's subjects should be over 3 years old and had signed the informed consent form under the supervision of parents; (2) their subjects are either mild to severe visual impairment with eyes' degree about 0.1 ~ 0.8 or blindness. After medical treatment, they are still unable (or very difficult) to make accurate visual recognition to external things; (3) their subjects do not have basic disease, drug allergy history and are not gravid; (4) these studies aimed to explore visual impairment and pragmatic impairment like social cognition, communication, skills, behavior and intelligence in people from low vision to blindness in minors or adults. And there are no interests from authors and the experimental process and results are clear.

Studies were excluded if: (1) their research topics are not related to pragmatics; (2) methods and subjects are not in line with experimental specifications; (3) there are some interests from authors; (4) visual impairment with eyes' degree over 0 ~ 0.8; (5) there are some faultiness in research results; (6) research process is unclear. The detailed inclusion or exclusion criteria and flowchart are provided in [S2 File](#).

The electronic search yielded 387 articles and 1 book in the study. After removing duplicates, 327 articles were left. We reviewed their titles, abstracts and references and eliminated any articles that clearly fell outside our inclusion criteria. If there was any doubt that can not be solved by researchers, the article was directly excluded. Combined, this process retained 29 articles. Subsequently, three researchers (Hong Xie, Lulu Cheng and Peng Wang) examined the full text of each article and made independent judgments as to whether the article met our inclusion or exclusion criteria. Disagreements were settled by face-to-face discussion until a consensus judgment was reached. Finally, 25 articles met our inclusion and exclusion criteria. The selection process is illustrated in [Fig 1](#).

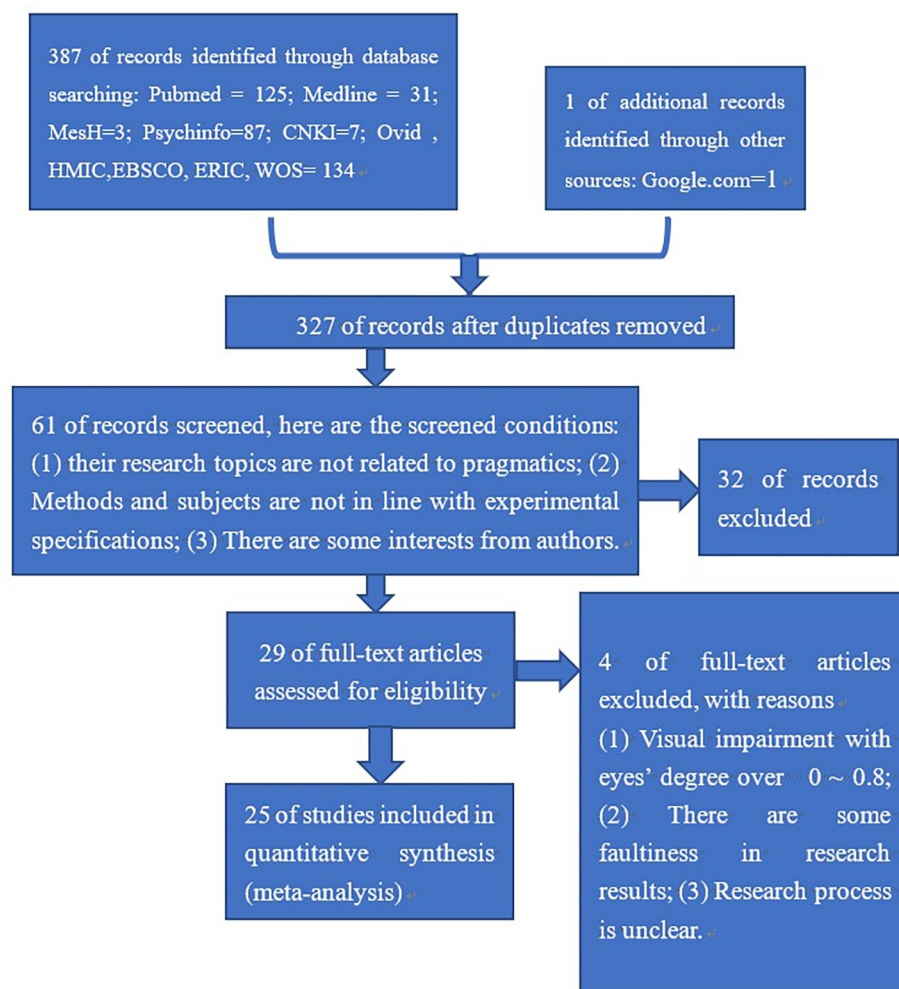

**Fig 1. Flow chart of study selection process.**

<https://doi.org/10.1371/journal.pone.0294326.g001>

## Risk of bias assessment

The method of risk of bias assessment is based on random allocation and allocation concealment (selection bias), personnel and participants (performance bias), result evaluation (detection bias), incomplete result data (natural attrition bias), selection of reported results (reporting bias) and sources (other biases) to display low, high and unclear bias risks for each included articles [26]. So according to its principle and practical steps, the 25 included studies in our study was evaluated by using the Cochrane collaboration's tool, RoB2, which is a domain-based evaluation tool in randomized trial [25]. Two independent researchers (Hong Xie and Peng Wang) separately assessed the eligibility and assessed the risk bias of the included studies. Any disagreement in screening the articles was resolved through discussion between these two researchers, with adjudication by the third researcher (Lulu Cheng) if disagreements persisted.

According to the Cochrane principles with the combination of reviewers' answers in our study, the risk of bias in each field may be divided into three levels: "low risk of bias", "some concerns" and "high risk of bias" [27]. If the risk of bias assessment result in all fields is "low

risk”, then the overall risk of bias is “low risk”. If the risk of bias evaluation result of some fields is “with certain risk” and there is no “high risk” field, then the overall risk of bias is “some concerns” [27]. As long as the assessment result of risk of bias in one field is “high risk”, the overall risk of bias is “high risk” [25, 27, 28].

## Data analysis

First of all, we conducted quality risk assessment on the included articles [29–46] by Review Manager 5.4 software to avoid the impact of high-risk dimensions on the study results [47].

Next, we assumed that patients with visual impairment will trigger pragmatic impairment. And the visual impairment was considered as the independent variable, while the pragmatic impairment was considered as the dependent variable. Duet to different samples characteristic in our included studies, we standardized mean difference in outcomes between the experimental and control groups to judge their risk bias. Meanwhile, we chose to use a random-effects model to summarize across studies. A random effects model assumes that the true intervention effect size varies depending on characteristics of the population studied or intervention employed.

A random-effects model is more conservative than a fixed-effects model because it produces a wider confidence interval for the summary effect size [48]. Therefore, we chose the  $p$  value in the Random Effect test to identify whether visual impairment will lead to pragmatic impairment. Meanwhile, because the age of different study samples is various, we used 18 years old as the cut-off point to conduct subgroup analysis after the random effect.

## Discussion and results

### Included studies characteristics

For the included 25 studies from 1995 to 2022 (Table 1), they are all come from SSCI, SCI, SCIE or ESCI publications in Pubmed, Medline and WOS websites. For instance, *Journal of autism and developmental disorders*, *Journal of visual impairment & blindness*, *Journal of child psychology and psychiatry*, *Brain and language*, *Psychiatry and clinical neurosciences*, *Autism* and so forth. Hence, in publications and research field, they have good representative.

Furthermore, we employed confidence interval (CI) to justice whether there is significant difference in included articles because participants in some included articles are significantly more than others. Statistically, 95%CI refers to the risk ratio will occur in the area with a possibility of 95% [49]. For example, as can be seen from Table 1, the article written by Anthony et al. (1999) have 95% CI from 0.71 to 2.77, meaning that in this experiment, visually impaired patients are about 3 times ( $2.77 / 0.71$ ) than non-visually impaired patients in terms of experiencing pragmatic impairment. According to this statistical step, we can find that whether studies with more than 100 experimental samples or lower than 100 experimental samples, their 95% CI difference between the minimum value and maximum value are equal to or greater than 1 time. Thus, the number of samples in the included articles has no significant difference, and has no impact on their research results [50]. Additionally, the experimental sample weight of different studies is centered around the median, 4.20%, and roughly evenly distributed on both sides. And this figure is closed to their average, 4.00%. The comparison indicates that the two figures are complementary to each other and each included article demonstrates similar contribution in our study. The average Z-score is 0.958, less than 1.000, indicating that each included article has sound accuracy and interpretability [51]. Combined, the quality of the included studies is similar and holds excellent validity in research time, experimental subjects and experimental specifications.

Table 1. Included studies characteristics.

| Author                  | Year | N     | Age      | Pragmatic Impairment Performance                                              | Weight | Risk Ratio                       | Z-score |
|-------------------------|------|-------|----------|-------------------------------------------------------------------------------|--------|----------------------------------|---------|
|                         |      |       |          |                                                                               |        | Risk Ratio \ M-H, Random, 95% CI |         |
| Anthony et al.          | 1999 | 18    | 6–13     | can not understand non-literal language and advanced theory of mind           | 4.10%  | 1.40 [0.71, 2.77]                | -0.477  |
| Anthony et al.          | 2010 | 16    | 7–15     | language impairment                                                           | 4.00%  | 1.17 [0.53, 2.57]                | 0.147   |
| Brunes et al.           | 2019 | 15620 | 7–18     | abnormally communicate                                                        | 4.40%  | 40.17 [33.45, 48.25]             | 4.976   |
| Carretti et al.         | 2022 | 96    | 3–18     | behavior like autism                                                          | 4.30%  | 2.43 [1.51, 3.91]                | 0.671   |
| Elizabeth et al.        | 2009 | 85    | < 18     | social communication difficulties                                             | 3.90%  | 6.98 [2.66, 18.27]               | 1.894   |
| Glatz et al.            | 2022 | 7715  | 3–18     | communication and cooperation difficulties                                    | 4.40%  | 6.00 [4.90, 7.34]                | 1.616   |
| Habib et al.            | 2018 | 80    | 3–33     | behavior like autism                                                          | 3.80%  | 4.00 [1.47, 10.92]               | 1.061   |
| Haegele et al.          | 2018 | 12    | 3–9      | abnormal executive functions                                                  | 3.40%  | 4.33 [1.03, 18.17]               | 1.119   |
| Heppe et al.            | 2020 | 76    | 50 or so | intellectual disabilities can not develop completely with the increase of age | 4.00%  | 8.98 [3.86, 20.89]               | 2.261   |
| James et al.            | 2006 | 8     | 3–8      | behavior like autism                                                          | 4.20%  | 0.94 [0.50, 1.78]                | 0.243   |
| Jeremy et al.           | 2010 | 83    | 3–8      | individuals with visual impairment exist autism                               | 4.30%  | 1.01 [0.75, 1.34]                | 0.257   |
| Jesper                  | 2014 | 138   | < 15     | communication skills lag behind common children                               | 4.30%  | 2.29 [1.55, 3.37]                | 0.571   |
| Judith et al.           | 2012 | 48    | 4–11     | social understanding development lags behind common children                  | 4.40%  | 1.00 [0.89, 1.13]                | 0.242   |
| Linda et al.            | 1998 | 32    | 9–12     | problems with social cognition                                                | 3.70%  | 3.00 [0.99, 9.08]                | 0.712   |
| Lisa et al.             | 2011 | 41    | 13–19    | can not understand correctly semantic relations                               | 4.40%  | 0.74 [0.56, 0.96]                | 0.169   |
| Lourens et al.          | 2016 | 30    | 7–15     | conservation difficulties                                                     | 3.30%  | 10.33 [2.25, 47.53]              | 2.321   |
| McAlpine et al.         | 1995 | 31    | >18      | have impact on life satisfaction                                              | 3.90%  | 0.89 [0.34, 2.31]                | 0.211   |
| Mukaddes et al.         | 2007 | 257   | >18      | education difficulties                                                        | 4.40%  | 1.31 [1.13, 1.52]                | 0.302   |
| Nawoja                  | 2015 | 104   | 15–22    | social participation difficulties                                             | 4.30%  | 2.71 [1.68, 4.37]                | 0.604   |
| Pearl                   | 2010 | 102   | 13–18    | have impact on life quality                                                   | 4.30%  | 1.00 [0.63, 1.59]                | 0.211   |
| Rachel et al.           | 1997 | 43    | >18      | pragmatic development vary                                                    | 3.50%  | 5.94 [1.54, 22.84]               | 1.216   |
| Ralejoe                 | 2021 | 10    | 18–33    | physical education difficulties                                               | 2.30%  | 5.67 [0.45, 71.51]               | 1.063   |
| Splunder et al.         | 2006 | 850   | 16–23    | people are trouble in inclusion to these people                               | 4.40%  | 0.99 [0.88, 1.13]                | 0.166   |
| Timothy et al.          | 2005 | 160   | >18      | low psychological well-being and life quality                                 | 4.40%  | 1.88 [1.51, 2.34]                | 0.293   |
| Urbaniak-Olejnik et al. | 2022 | 80    | 18–24    | hard to keep body balance                                                     | 3.70%  | 15.00 [4.98, 45.22]              | 2.088   |
|                         |      |       |          |                                                                               | -      | Average Z-score                  | 0.958   |

<https://doi.org/10.1371/journal.pone.0294326.t001>

## Risk of bias

Evidently, risk of bias assessment in the included articles in our meta analysis is comparatively qualified because the average ratio of low risk of bias is over 50%, while the total ratio of high risk of bias is roughly 10% (Fig 2). Some studies were assessed to unclear risk of bias because they did not provide information about randomization. Therefore, we can draw the following two results.

## Visual impairment may cause pragmatic impairment

Fig 3 displays the  $p$  value in the test for overall effect is 0.0005, which is less than 0.05. And the I square is 99%, manifesting that the forest plot generated from random effect is reasonable and its results have high interpretability [52]. Hence, our assumption is statistically significant, that is, the relationship of visual impairment and pragmatic impairment significantly exists. At the same time, the diamond located in approximately 1–5 odds ratio (in the range of 1–15), which does not intersect with invalid line, further supporting this conclusion statistically [48]. Visually impaired population cannot fully leverage their vision as a major medium to communicate.



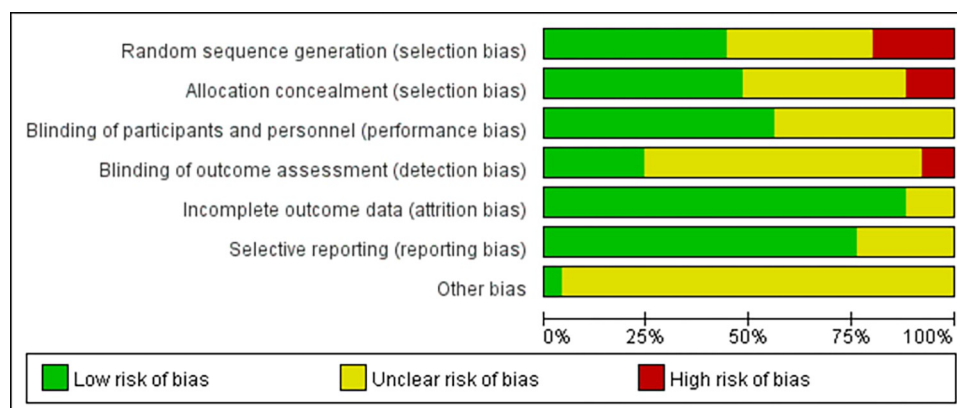

**Fig 2. Risk of bias.**

<https://doi.org/10.1371/journal.pone.0294326.g002>

With limited visual information receiving, individuals with visual impairment rely heavily on their auditory sensory channel regions like thalamus and temporal lobe to receive and comprehend information in pragmatic information reception [53]. Nevertheless, individuals with visual impairment, whether due to congenital conditions, acquired injuries, or progressive eye diseases, the thalamus may undergo certain changes and adaptations [7, 9, 54]. And the temporal lobe is also crucial for language comprehension, and visual impairment may influence how individuals with this condition process and understand language-related information [55]. Those factors about information processing in auditory channels may result in pragmatic impairment. Furthermore, auditory information transmission passes thalamus, temporal lobe, and Broca's area controlling speech communication including nucleus basalis magnocellularis cholinergic system [56], which plays an essential role in attention performance, executive functions of discourse comprehension and theory of mind development [57–59].

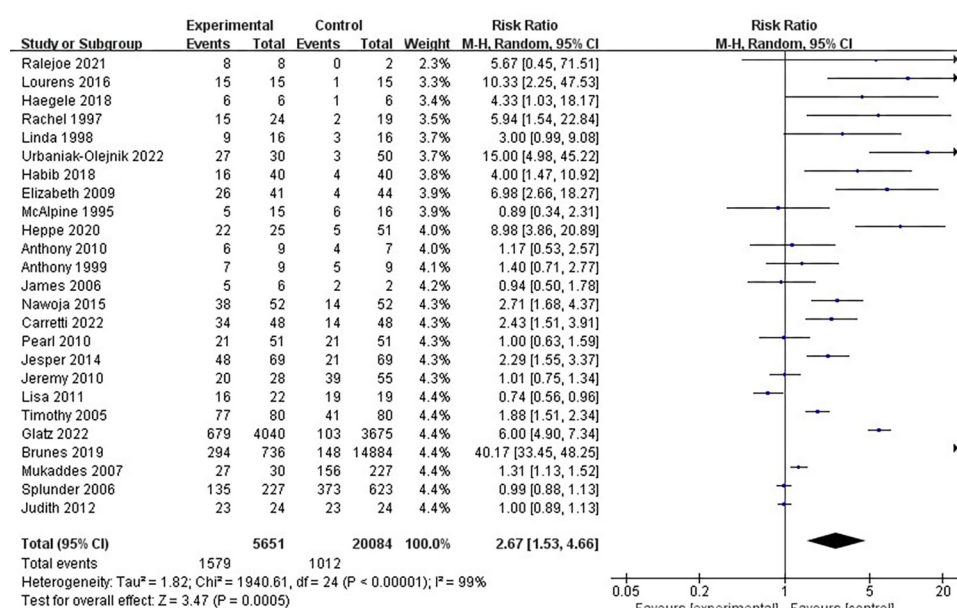

**Fig 3. Forest plot of the random effect of the relationship between visual impairment and pragmatic impairment.**

<https://doi.org/10.1371/journal.pone.0294326.g003>

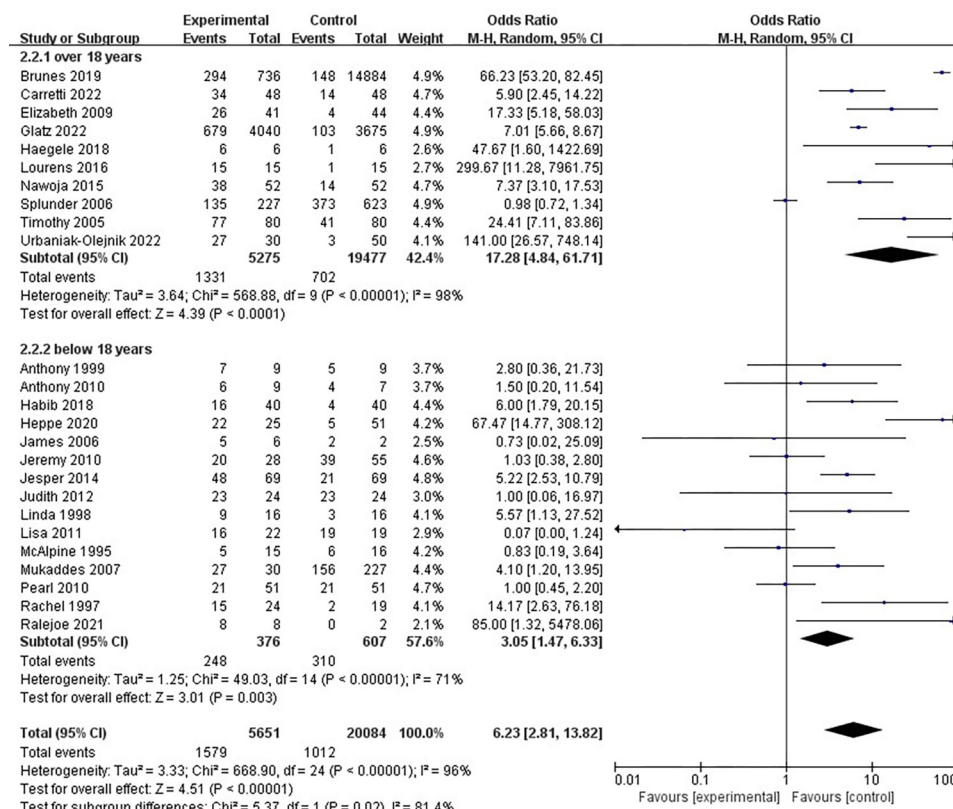

**Fig 4. Subgroup forest plot of the random effect of the relationship between age and pragmatic impairment.**

<https://doi.org/10.1371/journal.pone.0294326.g004>

Moreover, psychological factors including social isolation, low self-esteem and self-confidence, anxiety and stress, communication apprehension can play a significant role in pragmatic impairment experienced by the visually impaired population [22, 36]. For instance, visually impaired individuals may develop communication apprehension, fearing potential misunderstandings or misinterpretations during interactions. This fear can lead to avoidance of social communication, perpetuating pragmatic impairment. Thus, interventions focused on building self-confidence, reducing anxiety, fostering social support networks, and providing training in effective social communication can be beneficial in improving pragmatic language skills in this population.

Additionally, researchers have shown that there is an increased likelihood of individuals, from birth or from an early childhood, with visual impairment also having autism [60–63]. Lipton (1979) named those blind children with a stereotypical and repetitive behavior as “blindism” [64]. While Wrzesinska (2017) put that the deficiency of sensory and social stimuli might be responsible for the development of autistic-like behaviors. So visual impairment in children made their psycho-social development slower and might account for development of autistic-like behaviors as well. Although no explicit confirmation showed that some visual impairment was a factor of determining autism, individuals with visual impairment and autism have weathered pragmatic impairment, mostly with reference to their relations with other people and emotional expression due to a delay in more advanced theory of mind understanding [3, 7, 8, 19–21]. Therefore, with the combination of statistical results in this study and current literature findings, people with visual impairment from low vision to blindness may cause pragmatic problems.



### Age do not affect pragmatic impairment occurrence

Some studies consider that age plays an essential role in visual impairment, particularly for the children, and the adults given their different eyeball changes in terms of structure and functions [57, 65, 66]. So it is necessary to conduct a subgroup analysis for adults and minors. As can be seen from Fig 4, samples were divided into over 18 years old and below 18 years old. On the one hand, the  $p$  value is significant. The former  $p < 0.0001$ , and the latter  $p = 0.003 < 0.05$ , which are obviously significant in the relation assumption of age and pragmatic impairment. Additionally, because some participants in included articles were just 18 years old, which is difficult to distinguish their subgroup, we distribute them evenly between two groups. The distribution may result in the slightly high of  $I^2$  square in the two subgroups, with the value of 98% and 71%, respectively. However, compared with 96%  $I^2$  square ( $P < 0.0001$ ) after their combination, the two figure still have interpretability and can infer a reliable result [52].

There are 5275 people over 18 years old in experimental group, while there are 376 people below 18 years old. The two number are lower than that of control group and the diamond is also in the left side (in the range of 1–15), indicating subgroup analysis result is in line with the superior analysis result [67]. Visual impairment occurs at different ages, including congenital visual impairment and acquired visual impairment. Congenital visual impairment accompanies the whole process of language acquisition, especially the development and maturity of pragmatic competence [4, 12, 23]. Acquired visual impairment is closely related to patients' psychological endurance and mental status, and plays an important role in the multimodal information reception process in social interaction. Furthermore, pragmatic competence is a vital ability for people to communicate with each other at any age. Therefore, by and large, pragmatic impairment is independent of the age among individuals from low vision to blindness.

### Conclusion

This analysis from the included articles with relatively low risk of bias as a whole provides evidence for the assumption that visual impairment may cause pragmatic impairment statistically and psychologically. The argumentation also provides a theoretical basis for further study of discourse pragmatic impairment of people with visual impairment or autism spectrum disorder and visual impairment concurrently. Moreover, these results also offer a theoretical dimension for clinical identification and rehabilitation of individuals with visual impairment. However, some limitations can be seen in our study. On the one hand, studies carried out before 1995 are ignored and experimental subjects below 3 years old are excluded, resulting in a limited research scope in year and age. On the other hand, the research results are limited by the research quality of the included articles. Whether articles with different quality have impacts on research results also deserves to discuss in depth. Therefore, further research could be focused on some detailed areas, for instance, the different quality influence of the included literature to research results, the features of visual impairment and pragmatic impairment in different ages and different social communication, the brain cognition process of people with visual impairment and pragmatic impairment like the phonetic-vocabulary processing mechanism and semantic conversion process.

### Supporting information

**S1 Checklist. PRISMA checklist.**  
(PDF)

**S1 File. Electronic search strategy.**

(PDF)

**S2 File. Inclusion/exclusion criteria and flow.**

(PDF)

**Acknowledgments**

Lulu Cheng and Hong Xie have the same contribution to this work, and should be considered as co-first authors. The author contributions are as following. Hong Xie & Lulu Cheng: data curation, formal analysis, investigation, methodology, funding acquisition, project administration, supervision, writing—original draft and writing—review & editing; Wang Peng: conceptualization, formal analysis, investigation, resources and writing—original draft; Ting Zhang: writing—review & editing.

**Author Contributions**

**Conceptualization:** Peng Wang.

**Data curation:** Hong Xie.

**Formal analysis:** Hong Xie, Peng Wang.

**Funding acquisition:** Cheng Lulu.

**Investigation:** Hong Xie, Peng Wang.

**Methodology:** Hong Xie.

**Project administration:** Cheng Lulu.

**Resources:** Peng Wang.

**Supervision:** Cheng Lulu.

**Writing – original draft:** Hong Xie, Peng Wang.

**Writing – review & editing:** Cheng Lulu, Ting Zhang.

**References**

1. Yaroshenko O M, Anisimova H V, Koliesnik T V, et al. National strategy for a barrier-free environment: problems, tolerance and implementation. *International social work*, 2022: 00208728221126002. <https://doi.org/10.1177/00208728221126002>.
2. World Health Organization. WHO global report on traditional and complementary medicine 2019. Geneva: World Health Organization, 2019.
3. Martin I, McDonald S. Weak coherence, no theory of mind, or executive dysfunction? Solving the puzzle of pragmatic language disorders. *Brain and language*, 2003, 85(3): 451–466. [https://doi.org/10.1016/S0093-934X\(03\)00070-1](https://doi.org/10.1016/S0093-934X(03)00070-1) PMID: 12744957
4. Ryder N, Leinonen E, Schulz J. Cognitive approach to assessing pragmatic language comprehension in children with specific language impairment. *International journal of language & communication disorders*, 2008, 43(4): 427–447. <https://doi.org/10.1080/13682820701633207> PMID: 18584419
5. Perkins M R. Pragmatic impairment. *The handbook of language and speech disorders*, 2010: 227–246. <https://doi.org/10.1002/9781119606987.ch10>.
6. Van Splunder J, Stilma J S, Bernsen R M D, et al. Prevalence of visual impairment in adults with intellectual disabilities in the Netherlands: cross-sectional study. *Eye*, 2006, 20(9): 1004–1010. <https://doi.org/10.1038/sj.eye.6702059> PMID: 16151486
7. Judith P. Mathijs P. J. Steenbergen B. Pragmatic abilities in children with congenital visual impairment: an exploration of non-literal language and advanced theory of mind understanding. *Journal of autism*

- and developmental disorders, 2012, 42: 2440–2449. <https://doi.org/10.1007/s10803-012-1500-5> PMID: 22437442
8. Nawoja M. The associative structure of the mental lexicon: hierarchical semantic relations in the minds of blind and sighted language users. *Psychology of language and communication*, 2015, 19(1): 1–18. <https://doi.org/10.1515/plc-2015-0001>.
  9. Chokron S, Kovarski K, Zalla T, et al. The inter-relationships between cerebral visual impairment, autism and intellectual disability. *Neuroscience & biobehavioral reviews*, 2020, 114: 201–210. <https://doi.org/10.1016/j.neubiorev.2020.04.008> PMID: 32298709
  10. James D M, Stojanovic V. Communication skills in blind children: a preliminary investigation. *Child: care, health and development*, 2007, 33(1): 4–10. <https://doi.org/10.1111/j.1365-2214.2006.00621.x> PMID: 17181747
  11. Jeremy R P, Naomi J D, Lara M S, et al. Social Communication difficulties and autism spectrum disorder in young children with optic nerve hypoplasia and / or septo-optic dysplasia. *Developmental medicine & child neurology*, 2010, 52(10): 917–921. <https://doi.org/10.1111/j.1469-8749.2010.03664.x>.
  12. Linda P, Dewart H, Brockbank M. Social cognition in children with visual impairments. *Journal of visual impairment & blindness*, 1998, 92(11): 754–768. <https://doi.org/10.1177/0145482x9809201104>.
  13. Haegele J A, Kirk T N, Zhu X. Self-efficacy and physical activity among adults with visual impairments. *Disability and health journal*, 2018a, 11(2): 324–329. <https://doi.org/10.1016/j.dhjo.2017.10.012> PMID: 29126897
  14. Haegele J A, Zhu X, Kirk T N. Weekday physical activity and health-related fitness of youths with visual impairments and those with autism spectrum disorder and visual impairments. *Journal of visual impairment & blindness*, 2018b, 112(4): 372–384. <https://doi.org/10.1177/0145482x1811200404>.
  15. Brunet A, B. Hansen M Heir T. Loneliness among adults with visual impairment: prevalence, associated factors, and relationship to life satisfaction. *Health and quality of life outcomes*, 2019, 17: 1–7. <https://doi.org/10.1186/s12955-019-1096-y>.
  16. Qiu S, An P, Hu J, et al. Understanding visually impaired people's experiences of social signal perception in face-to-face communication. *Universal access in the information society*, 2020, 19: 873–890. <https://doi.org/10.1007/s10209-019-00698-3>.
  17. Perkins M. *Pragmatic impairment*. Cambridge: Cambridge University Press, 2007.
  18. Cummings L. *Clinical pragmatics*. Cambridge: Cambridge University Press, 2009.
  19. Marocchini E. Impairment or difference? The case of theory of mind abilities and pragmatic competence in the autism spectrum. *Applied psycholinguistics*, 2023: 1–19. <https://doi.org/10.1017/s0142716423000024>.
  20. Nguyen T N, Gonzalez C. Theory of mind from observation in cognitive models and humans. *Topics in cognitive science*, 2022 (4): 665–686. <https://doi.org/10.1111/tops.12553> PMID: 34165919
  21. Hamilton J, Radlak B, Morris P G, et al. Theory of mind and executive functioning following stroke. *Archives of clinical neuropsychology*, 2017, 32(5): 507–518. <https://doi.org/10.1093/arclin/acx035> PMID: 28453602
  22. Kisi M, Nagar R, Knoll N. Psychological factors involved in the acquisition of a foreign language among students with visual impairments. *British journal of visual impairment*, 2022 (2): 196–208. <https://doi.org/10.1177/0264619620961806>.
  23. Cummings L. Cognitive aspects of pragmatic disorders. *Research in clinical pragmatics*, 2017: 587–616. [https://doi.org/10.1007/978-3-319-47489-2\\_22](https://doi.org/10.1007/978-3-319-47489-2_22).
  24. Cummings L. *Research in Clinical Pragmatics*. Nottingham: Springer, 2017.
  25. Minozzi S, Dwan K, Borrelli F, et al. Reliability of the revised Cochrane risk-of-bias tool for randomised trials (RoB2) improved with the use of implementation instruction. *Journal of clinical epidemiology*, 2022, 141: 99–105. <https://doi.org/10.1016/j.jclinepi.2021.09.021> PMID: 34537386
  26. Page MJ, Higgins J, Sambunjak D, et al. Module 5: introduction to study quality and risk of bias. in: *cochrane interactive learning: conducting an intervention review*. cochrane, 2017. Available from <https://training.cochrane.org/interactivelearning/module-5-introduction-study-quality-and-risk-bias>.
  27. Higgins J P T, Sterne J A C, Savovic J, et al. A revised tool for assessing risk of bias in randomized trials. *Cochrane database of systematic reviews*, 2016, 10(1): 29–31. <https://methods.cochrane.org/bias/resources>.
  28. Sterne J A C, Hernán M A, Reeves B C, et al. ROBINS-I: a tool for assessing risk of bias in non-randomised studies of interventions. *Bmj*, 2016, 355. <https://doi.org/10.1136/bmj.i4919> PMID: 27733354
  29. Anthony L, Hobson R P. Reversible autism among congenitally blind children? a controlled follow-up study. *Journal of child psychology and psychiatry*, 2010, 51(11): 1235–1241. <https://doi.org/10.1111/j.1469-7610.2010.02274.x> PMID: 20584101

30. Lourens H, Swartz L. Experiences of visually impaired students in higher education: bodily perspectives on inclusive education. *Disability & society*, 2016, 31(2): 240–251. <https://doi.org/10.1080/09687599.2016.1158092> PMID: 27917028
31. Heppe E C M, Willemen A M, Kef S, et al. Improving social participation of adolescents with a visual impairment with community-based mentoring: results from a randomized controlled trial. *Disability and rehabilitation*, 2020, 42(22): 3215–3226. <https://doi.org/10.1080/09638288.2019.1589587> PMID: 31066313
32. Habib F, Irshad E. Impact of Visual Impairment on Quality of Life among Adolescents. *FWU Journal of Social Sciences*, 2018, 12(1): 149–155. <https://doi.org/10.1177/0264619617737123>.
33. Glatz M, Riedl R, Glatz W, et al. Blindness and visual impairment in central Europe. *Plos one*, 2022, 17(1): 1–14. <https://doi.org/10.1371/journal.pone.0261897> PMID: 35025896
34. Haegele J A, Kirk T N. Experiences in physical education: exploring the intersection of visual impairment and maleness. *Adapted physical activity quarterly*, 2018, 35(2): 196–213. <https://doi.org/10.1123/apaq.2017-0132> PMID: 29529866
35. Ralejoe M. A study to understand the inclusion of learners with and without visual impairment in a secondary school in Lesotho. *South African journal of education*, 2021, 41(1): 1–12. <https://doi.org/10.15700/saje.v41n1a1746>.
36. Carretti G, Mirandola D, Sgambati E, et al. Survey on psychological well-being and quality of life in visually impaired individuals: dancesport vs. other sound input-based sports. *International journal of environmental research and public health*, 2022, 19(8): 4438. <https://doi.org/10.3390/ijerph19084438> PMID: 35457304
37. Urbaniak-Olejnik M, Loba W, Stieler O, et al. Body balance analysis in the visually impaired individuals aged 18–24 years. *International journal of environmental research and public health*, 2022, 19(21): 14383. <https://doi.org/10.3390/ijerph192114383> PMID: 36361259
38. Anthony L, Peter H R, Brown R. Autism and congenital blindness. *Journal of autism and developmental disorders*, 1999, 29: 45–56. <https://doi.org/10.1023/a:1025918616111> PMID: 10097994
39. Elizabeth M E, Helen G E, David B E, et al. Vision in children and adolescents with autistic spectrum disorder: evidence for reduced convergence. *Journal of autism and developmental disorders*, 2009, 39(7): 965–975. <https://doi.org/10.1007/s10803-009-0705-8> PMID: 19224351
40. Jesper D. Symptoms of autism among children with congenital deafblindness. *Journal of autism and developmental disorders*, 2014, 44: 1095–1102. <https://doi.org/10.1007/s10803-013-1967-8> PMID: 24127166
41. Lisa M R, Cornish K M, Fombonne E. Diagnostic differentiation of autism spectrum disorders and pragmatic language impairment. *Journal of autism and developmental disorders*, 2011, 41: 1694–1704. <https://doi.org/10.1007/s10803-011-1196-y> PMID: 21416199
42. McAlpine L M, Moore C L. The development of social understanding in children with visual impairments. *Journal of visual impairment & blindness*, 1995, 89(4): 349–358. <https://doi.org/10.1177/0145482x9508900408>.
43. Klümper W, Qaim M. A meta-analysis of the impacts of genetically modified crops. *Plos one*, 2014, 9(11): e111629. <https://doi.org/10.1371/journal.pone.0111629> PMID: 25365303
44. Mukaddes N M, Kilincaslan A, Kucukyazici G, et al. Autism in visually impaired individuals. *Psychiatry and clinical neurosciences*, 2007, 61(1): 39–44. <https://doi.org/10.1111/j.1440-1819.2007.01608.x> PMID: 17239037
45. Pearl E. Visual impairment, verbal humor, and conservation. *The Journal of genetic psychology*, 1986, 147(1): 107–111. <https://doi.org/10.1080/00221325.1986.9914485> PMID: 3723119
46. Rachel B, Hobson R P, Lee A, et al. Are there “autistic-like” features in congenitally blind children?. *Journal of child psychology and psychiatry*, 1997, 38(6): 693–703. <https://doi.org/10.1111/j.1469-7610.1997.tb01696.x> PMID: 9315979
47. Timothy S H, Tina L, et al. Parker. Autistic-like behavior in CHARGE syndrome. *American journal of medical genetics*, 2005, 133(3): 257–261. <https://doi.org/10.1002/ajmg.a.30545>.
48. DerSimonian R, Laird N. Meta-analysis in clinical trials. *Controlled clinical trials*, 1986, 7(3): 177–188. [https://doi.org/10.1016/0197-2456\(86\)90046-2](https://doi.org/10.1016/0197-2456(86)90046-2) PMID: 3802833
49. Neyman J. Outline of a theory of statistical estimation based on the classical theory of probability. *Philosophical transactions of the royal society A*. 1937, 236 (767): 333–380. <https://doi.org/10.1525/9780520327016-022>.
50. Haase M, Bellomo R, Devarajan P, et al. Accuracy of neutrophil gelatinase-associated lipocalin in diagnosis and prognosis in acute kidney injury: a systematic review and meta-analysis. *American journal of kidney diseases*, 2009, 54(6): 1012–1024. <https://doi.org/10.1053/j.ajkd.2009.07.020>.

51. Curtis A E, Smith T A, Ziganshin B A, et al. The mystery of the Z-score. *Aorta*, 2016, 4(04): 124–130. <https://doi.org/10.12945/j.aorta.2016.16.014> PMID: 28097194
52. Higgins J P T, Thompson S G, Deeks J, et al. Measuring inconsistency in meta-analyses. *British medical journal*. 2003, 327(7414): 557–560. <https://doi.org/10.1136/bmj.327.7414.557> PMID: 12958120
53. Gao S, Wang Y, Gao X, et al. Visual and auditory brain–computer interfaces. *IEEE transactions on bio-medical engineering*, 2014, 61(5): 1436–1447. <https://doi.org/10.1109/TBME.2014.2300164> PMID: 24759277
54. Kelly C, Meyer J, Hanks V, et al. Neurorehabilitation for an individual with bilateral thalamic stroke and preexisting visual impairment presenting with impaired use of sensory cues: A case report. *Physiotherapy theory and practice*, 2021, 37(10): 1139–1145. <https://doi.org/10.1080/09593985.2019.1683920> PMID: 31657267
55. Girardi-Schappo M, Fadaie F, Lee H M, et al. Altered communication dynamics reflect cognitive deficits in temporal lobe epilepsy. *Epilepsia*, 2021, 62(4): 1022–1033. <https://doi.org/10.1111/epi.16864> PMID: 33705572
56. Fovet T, Yger P, Lopes R, et al. Decoding activity in Broca's area predicts the occurrence of auditory hallucinations across subjects. *Biological psychiatry*, 2022, 91(2): 194–201. <https://doi.org/10.1016/j.biopsych.2021.08.024> PMID: 34742546
57. Peterson C, Peterson J L, Webb J. Factors influencing the development of a theory of mind in blind children. *British journal of developmental psychology*, 2000, 18(3): 431–447. <https://doi.org/10.1348/026151000165788>.
58. Green S, Pring L, Swettenham J. An investigation of first-order false belief understanding of children with congenital profound visual impairment. *British journal of developmental psychology*, 2004, 22(1): 1–17. <https://doi.org/10.1348/026151004772901087>.
59. Brambling M, Asbrock D. Validity of false belief tasks in blind children. *Journal of autism and developmental disorders*, 2010, 40(12): 1471–1484. <https://doi.org/10.1007/s10803-010-1002-2> PMID: 20379770
60. Keeler W R. Autistic patterns and defective communication in blind children with retrolental fibroplasia. *Proceedings of the annual meeting of the American psychopathological association*, 1956, 64–83. PMID: 13518120.
61. Wing L. The handicaps of autistic children—a comparative study. *Journal of child psychology and psychiatry*, 1969, 10: 1–40. <https://doi.org/10.1111/j.1469-7610.1969.tb02066.x> PMID: 4243575
62. Brown R P, Hobson P, Lee A, et al. Are there “autistic-like” features in congenitally blind children? *Journal of child psychology and psychiatry*. 1997, 38(6): 693–703. <https://doi.org/10.1111/j.1469-7610.1997.tb01696.x> PMID: 9315979
63. Wrzesińska M, Kapias J, Nowakowska-Domagala K, et al. Visual impairment and traits of autism in children. *Psychiatria Polska*, 2017, 51(2): 349–358. <https://doi.org/10.12740/pp/onlinefirst/61352>.
64. Lipton E L. Insights from the blind; comparative studies of blind and sighted infants. *Journal of the American Psychoanalytic Association*, 1979, 27(1): 273–276. <https://doi.org/10.1176/ajp.135.5.630>.
65. Ryan J. Harvard Medical School scientists reverse age-related vision loss, eye damage from glaucoma in mice. [2020-12-2]. <https://news.harvard.edu/gazette/story/2020/12/reversing-glaucoma-damage-and-vision-loss/>.
66. Collerton J, Davies K, Jagger C, et al. Health and disease in 85 years old: baseline findings from the Newcastle 85+ cohort study. *British medical journal*, 2009, 339: 1–11. <https://doi.org/10.1136/bmj.e4462>.
67. Kelley J M, Kraft-Todd G, Schapira L, et al. The influence of the patient-clinician relationship on health-care outcomes: a systematic review and meta-analysis of randomized controlled trials. *Plos one*, 2014, 9(4): e94207. <https://doi.org/10.1371/journal.pone.0094207> PMID: 24718585
